# Supplementary material
Source: PubMed Central journal article supplement (PMC5697898)
Supplement: NIHMS917152-supplement-Labeled.pdf [file NIHMS917152-supplement-Labeled.pdf]

1 **Reproductive toxicity of linuron following gestational exposure in rats and underlying**  
2 **mechanisms**

3 Hongwei Ding<sup>1</sup>, Wei Zheng<sup>2</sup>, Hua Han<sup>1</sup>, Xiyin Hu<sup>1</sup>, Binli Hu<sup>1</sup>, Feng Wang<sup>1</sup>, Liyu Su<sup>1</sup>, Hong Li<sup>1</sup>,  
4 and Yan Li<sup>1,\*</sup>

5 <sup>1</sup>Department of Hygiene Toxicology, School of Public Health, Zunyi Medical College, Zunyi,  
6 Guizhou, PRC

7 <sup>2</sup>School of Health Sciences, Purdue University, West Lafayette, Indiana, USA

8

9 **Running Title:** Reproductive Toxicity of Linuron in Male Rats

10

11 \*To whom all ~~correspondences shall be addressed;~~

12 Yan Li, Ph.D.

13 Department of Hygiene Toxicology

14 School of Public Health

15 Zunyi Medical College

16 Zunyi, Guizhou 563000

17 China.

18 E-mail: dinghw0222@163.com

19

20

21 Submitted to *Toxicol Letters*

Deleted: correspondances

Deleted: sent

24 **Abstract**

25 Linuron is a widely used herbicide in ~~agriculture~~; its endocrine disruptive toxicity has recently  
26 received public attention. This study was designed to examine the developmental toxicity of  
27 linuron on ~~the reproductive system of male offsprings~~ following maternal exposure. Mother rats  
28 received oral gavages of linuron, once daily, at the dose of 0, 50, 100, 150 or 200 mg/kg, from  
29 gestational day (GD)13 to GD18; ~~gonadal~~ organs from GD20 fetuses were examined. Data  
30 indicated that ~~exposed male offsprings~~ had a significantly shortened anogenital distance.  
31 Pathological examination further revealed a lack of fusion in the urogenital fold in treated fetuses,  
32 the damaged seminiferous tubules, and the ~~injured~~ Leydig cell ultrastructure. Analysis of serum  
33 testosterone concentrations at postnatal day (PND)2 showed a significant dose-related reduction  
34 (about ~~33.7-58.75%~~, ~~r=-0.838~~, ~~p<0.05~~) as compared to controls. ~~Immunohistochemical~~ results  
35 demonstrated a significantly reduced expression of enzymes pertinent to the ~~testosterone~~  
36 production including P450<sub>scc</sub>, 3 $\beta$ -HSD, and PCNA in Leydig cells (p<0.05). qPCR studies  
37 confirmed decreased levels of mRNAs encoding P450<sub>scc</sub>, 3 $\beta$ -HSD and PCNA (p<0.05). Taken  
38 ~~together~~, these data suggest that maternal exposure to linuron hampers ~~the~~ male gonadal organ  
39 development; ~~this~~ appears to be due to linuron's direct action on the production of testosterone in  
40 fetal and postnatal ~~offspring~~.

41  
42 Key words: ~~Linuron~~; ~~testosterone~~; offspring; reproductive toxicity; developmental toxicity; fetus;  
43 Leydig cells

Deleted: argiculture

Deleted: male offspring

Deleted: godanal

Deleted: the

Deleted: injured

Deleted: 34-46

Deleted: 845

Deleted: stry

Deleted: Immunohistoche  
mistrical

Deleted: testosterone

Deleted: togather

Deleted: T

Deleted: offsprings

Formatted:  
Widow/Orphan control

Deleted: linuron

Deleted: testosterone

60 **Introduction**

61 ~~Reproductive~~ disorders due to environmental exposure to ~~antiandrogenic~~ pesticides,  
62 fungicides, and herbicides have been well recognized in literature (Auger et al., 2013; Klot et al.,  
63 2014; Monosson et al., 1999;). Particularly alarming is the increased incidence of developmental  
64 disorders ~~in male reproductive system tract~~ ~~due to exposure to these toxicants~~ (Sharpe and  
65 Skakkebaek, 1993; Storgaard et al., 2006). Toxic chemicals can interact with the androgen  
66 receptor (AR), alter the production and metabolism of ~~testosterone, and/or~~ directly damage the  
67 formation of male reproductive organs in ~~the~~ fetal stage. While studies on the reproductive  
68 toxicity of antiandrogenic substances are extensive, the mechanisms ~~underlying these toxic~~  
69 actions in most cases remain elusive.

70 Linuron (also called methoxydiuron or afalon; CAS#330-55-2) is a widely used herbicide  
71 in the production of soybeans, corn, cotton, carrots, wheat, peanuts, sugar cane, fruit and other  
72 vegetables. Reports in literature suggest that linuron acts as an environmental endocrine  
73 disruptor; short-term exposures to linuron in rats result in a reduced production of testosterone  
74 (Lambright et al., 2000; Santos et al., 2014; Wilson et al., 2009). Exposure to linuron in mothers  
75 also causes the abnormal sexual differentiation and development in male offspring, such as  
76 hypospadias, cryptorchidism, prostate hyperplasia, and testicular atrophy (~~McIntyre, et al., 2000;~~  
77 Hotchkiss et al., 2004; Sultan et al., 2001). The deformity of the male reproductive system is  
78 irreversible and persistent, and ~~may last for~~ ~~lifetime~~. ~~Limited~~ data from in vivo and in vitro  
79 experiments suggest that linuron may compete with androgen for the AR binding (Gray et al.,  
80 2001; Lambright et al., 2000). Yet, the current understanding on how maternal exposure to this

Deleted: Reproductive

Deleted: antiandrogenic

Deleted: of

Deleted: testosterone

Deleted: of

Deleted: seepred  
epididymis,

Deleted: Barlow

Deleted: 3

Deleted: s

Deleted: the

Deleted: Limited

93 chemical may lead to the altered development of male reproductive system and what mechanism  
94 underlies linuron toxicity is incomplete.

95 The purpose of this study was to explore and confirm the developmental toxicity of  
96 linuron on male reproductive system following maternal exposure by examining the changes in  
97 male sex hormone levels (testosterone) as well as in male reproductive organs in fetal and  
98 postnatal stages. It is known that the production of testosterone is regulated by P450sc, which  
99 catalyzes the formation of pregnenolone from cholesterol, and by 3 $\beta$ -HSD, which converts  
100 pregnenolone to progesterone (Arukwe, 2008, Rone et al., 2009, Issop et al., 2013). To  
101 understand the mechanism of linuron toxicity, we further investigated the changes of P450sc,  
102 3 $\beta$ -HSD and other male sex hormone-related enzymes in male offsprings after maternal exposure.  
103 The study, by offering a better understanding of linuron-induced reproductive toxicity, may  
104 provide the useful information for better prevention and intervention.

**Deleted:** . We first set out to

**Deleted:** e

**Deleted:** er

**Deleted:** following linuron exposure

**Deleted:** exposur

**Deleted:** in mothers

**Deleted:** Since

**Deleted:** pregnenolone

**Deleted:** effect of linuron exposure in mothers on these

**Deleted:** and proteins

**Deleted:** offsprings

**Deleted:** The study bears a significant public health importance through better understanding of the mechanism by which linuron

**Deleted:** causes reproductive toxicity

**Formatted:** Widow/Orphan control

129 **Materials and methods**

130 **Chemicals and reagents**

Deleted: Chemicals

131 Linuron was purchased from Chem Service Inc. (West Chester, USA); the enzyme-linked  
132 immunosorbent assay (ELISA) kit to quantify serum total testosterone from Diagnostic Products  
133 Corp. (Los Angeles, CA); all primary and secondary antibodies from Santa Cruz Biotechnology  
134 (Santa Cruz, CA); and formaldehyde and other routinely used reagents from Sigma (St. Louis,  
135 MO). All reagents were of analytical grade, HPLC grade or the best available pharmaceutical  
136 grade.

Deleted: Santz

137  
138 **Animals and treatments**

139 Sprague-Dawley rats (4-8 week) of both sexes were obtained from the Animal Center of  
140 the Third Military Medical University (Chongqing, China). Upon arrival, the animals were  
141 housed in a temperature ( $21 \pm 1^\circ\text{C}$ )- and humidity ( $55 \pm 5\%$ )-controlled room under a 12-hr  
142 light/dark cycle and allowed for acclimatization for two weeks prior to experimentation. At the  
143 time of experiment, rats were 9 weeks old weighing  $240 \pm 10$  g for males ( $n = 60$ ) and  $180 \pm 10$   
144 g for females ( $n = 60$ ). Rats had access to food and tap water at libitum. The study was  
145 conducted in compliance with the Animal Care and Use Guidelines in China and approved by the  
146 Animal Care and Use Committee of Zunyi Medical College.

Deleted: controlled

Deleted: one

Deleted: libitum

147 After acclimatization, each male rat was caged with two females. Vaginal smears were  
148 performed daily; the sperm-positive smear in female rats was considered as Gestational Day (GD)  
149 0. The pregnant dams were housed individually and were randomly assigned to one of the

155 following exposure conditions. Linuron was dissolved in groundnut oil. At GD13, mother rats  
156 received the oral gavage (2 mL/kg body weight), once daily, at the dose of 0 (control), 50, 100,  
157 150 or 200 mg/kg, for 5 consecutive days. The daily equivalent volume of oil vehicle was given  
158 to the animals in the control group. These dosage levels were selected based on the previous  
159 report in literature (Lambright et al., 2000). Each exposure group had 10 dams. At the designated  
160 time, mother and/or fetal male rats were dissected to determine reproductive toxicity.

Deleted: -7

Deleted: designatged

161 Daily oral gavage caused the minimal stress, as animals were gradually accustomed to the  
162 procedure. The dams were weighed daily before and after dose administration. After parturition  
163 (PND0), the pups were counted and weighed. Pups were then caged with their biological mother  
164 thereafter.

Deleted: customed

## 166 Pathological examination

167 At 20 days into pregnancy (GD20), four mother rats from each group were sacrificed to  
168 collect fetuses; the genital tubercle and testis of male fetal rats were isolated and prepared for  
169 pathological examination. Each sample was fixed in 4% formaldehyde for 24 hr; the samples  
170 were then dehydrated and embedded in paraffin according to the routine pathological sample  
171 preparation procedures. The tissues were cut into 5-mm section with a microtome and stained  
172 with haematoxylin and eosin (H&E). Each of tissue samples was made in triplicates. During the  
173 tissue dissection, the position of testis and the development of prostate were also observed.

Deleted: About

Deleted: the

Deleted: two

Deleted: For

Deleted: electorn

Deleted: , similar dissection procedures were performed on mother rats (GD 20) to collect 30 male fetuses, followed by extracting testes bilaterally. The same dams used for H&E.

174 The tissue samples from the same dams described above were used for electron  
175 microscopic examination. The testes were fixed in 3% glutaraldehyde solution for 6 hr and

Deleted: se

193 treated with 1% osmium tetroxide for 45 min for tissue preparation prior to electron microscopic  
194 analysis.

195

### 196 **Determination of serum testosterone levels in postnatal male rats**

197 Blood samples were collected from 2-3 PND2 male pups from 4-5 litters in each  
198 ~~treatment group~~ by decapitation and allowed to coagulate on ice. Serum samples were prepared  
199 by centrifuging the whole blood samples at approximately 1000×g at 4°C for 30 min and stored  
200 at -20°C until analysis. Serum total testosterone was determined in duplicates by using an  
201 enzyme-linked immunosorbent assay (ELISA) kit (Diagnostic Products Corp, Los Angeles, CA).

202

### 203 **Immunohistochemical examination**

204 Bilateral testes from male fetuses of GD20 rats (2 pups from 4 litters in each treatment  
205 group) were extracted as described above and prepared in 4% formaldehyde solution for 48 hr.  
206 Conventional immunohistochemical procedure (including dehydration in gradient ethanol,  
207 xylene clearance, and paraffin embedding) was followed to prepare the sections. Sections were  
208 heated to 62°C to remove wax and then rehydrated prior to treatment with blocking serum  
209 (phosphate-buffered saline/0.5% Triton X-100 with 5% serum) for 1 hr at room temperature.  
210 Primary antibodies, i.e., mouse Mab against 3β-HSD (1:300 dilution), mouse Mab against  
211 P450scc (1:200 dilution), anti-proliferating cell nuclear antigen (PCNA) (1:100 dilution) and  
212 mouse Mab against AR (1:200 dilution) were incubated overnight at 4°C. After washes, the  
213 sections were incubated at room temperature with the secondary antibodies for 1 hr. Secondary

Deleted: rats

215 antibodies included mouse anti-biotin (1:75 dilution) and goat anti-rabbit immunoglobulin G  
216 (IgG) rhodamine (1:300 dilution). Samples were examined under a light microscope; an  
217 IPWIN60 software was used to analyze the optical density (OD) value for the signals from  
218 ~~Leydig~~ cells. Each group had 8 sections and each section had 3 visual fields.

Deleted: leydig

219

### 220 **Real-time RT-qPCR analysis**

221 The expression levels of mRNAs encoding P450c17, 17 $\beta$ -HSD and AR in bilateral testes  
222 collected from male GD20 fetuses were quantified using qPCR. The total RNA was isolated by  
223 using TRIzol reagent. An aliquot of 0.5  $\mu$ g RNA was reverse-transcribed into cDNA. The iTaq  
224 Universal SYBR Green Supermix (Bio-Rad, CA) was used for qPCR analyses. The amplification  
225 was run in the FTC-2000A Real-Time PCR Detection system (Funglyn Biotech, CHN). After  
226 initial 2-min denaturation at 94 °C, the amplification program was set at 45 cycles of 20 sec  
227 denaturation at 94°C, 30 sec gradient 55.0 to 60.0°C and 40 sec extension at 72°C. Each  
228 real-time RT-PCR reaction was run in triplicates. The forward and reverse primers for tested  
229 genes were designed by Takara Biotechnology (Shiga, Japan). Primers sequences for these genes  
230 are listed in Table 1. The rat ~~glyceraldehyde~~-3-phosphate dehydrogenase (GAPDH) was used as  
231 an internal control. To compare the interest gene expression levels in different groups, the  
232 comparative  $2^{-\Delta\Delta Ct}$  method was used (Livak and Schmittgen, 2001).

Deleted: glyceraldehydes

233

### 234 **Statistical analysis**

235 The statistical analyses were performed with SPSS software version 21.0 for Windows



238 (SPSS Inc., Chicago, IL). Values of all variables are presented as mean  $\pm$  standard deviation.  
239 | One-way analysis of variance (ANOVA) with Tukey's HSD as post-hoc test and LSD-t test were  
240 used to determine the differences between different treatment groups. The differences between  
241 two means were considered significant if  $p$  values were equal or less than 0.05.

242 |

Formatted:  
Widow/Orphan control

243 **Results**

244 **Systemic effects of linuron on postnatal male rats following maternal exposure**

245 To understand the developmental toxicity of linuron on male reproductive system, the  
246 mother rats were orally exposed to various doses of linuron from GD13 to GD18; the male  
247 offspring were then subjected to testing serum testosterone level at postnatal day 2 (PND2), and  
248 to measurement of body weight and anogenital distance (AGD) at PND28. Linuron exposure in  
249 mothers caused a dose-related reduction in male offspring in their serum testosterone  
250 concentrations, about 33.7%, 46.0%, and 58.8% reduction in 100-mg/kg, 150-mg/kg and  
251 200-mg/kg groups, respectively, as compared to controls ( $p < 0.05$ ) (Table 2). A linear regression  
252 analysis of this dose-effect relationship established a correlation coefficient of  $r = -0.838$   
253 ( $p < 0.05$ ).

254 At PND28, while the body weights were not significantly changed in male offsprings, the  
255 AGD, as measured between the anus and penis, were significantly shortened in male pups of the  
256 linuron-exposed groups, about 17.7-24.6% reduction in 100-200 mg/kg groups, as compared to  
257 controls (Table 2). Further linear regression analysis revealed a dose-related correlation  
258 efficient of  $r = -0.873$  ( $p < 0.05$ ). Clearly, the maternal exposure to linuron caused the damage  
259 to offspring male reproductive functions.

261 **Pathological changes of fetal male reproductive system following maternal linuron**  
262 **exposure**

263 Oral exposure to linuron in maternal rats for five consecutive days caused a significant

Deleted: ¶

Deleted: developmental

Deleted: offsprings

Deleted: determination

Deleted: offsprings

Deleted: and

Deleted: 55.2

Deleted: and

Deleted: 688

Deleted: offsprings

Deleted: 8

Deleted: 19

Deleted: correlcaiton

Deleted: efficienct

Deleted: 845

Deleted: one week

280 pathological damage to offspring male reproductive structure (Fig. 1). In control fetuses, the HE  
281 staining showed that the genital tubercles possessed a well-developed urethra; the urogenital fold  
282 became confluent; and no epithelial gaps were observed (Fig.1A). In contrast, the samples from  
283 the linuron-exposed fetuses showed that the genital tubercles were opened with continuous  
284 urethral groove; there was no fusion in the urogenital fold, but the epithelial gaps were evident  
285 (Fig.1B). Noticeably also, the location of urethral opening was unusual. It is known that an  
286 incompletely developed urogenital fold will ultimately lead to hypospadias (Baskin et al., 2006).

287 Further examination of testicular cord under microscope revealed four typical cell types  
288 in the seminiferous tubules, including Leydig cells, spermatogonia, supporting Sertoli cells and  
289 peritubular myoid cells. In controls, spermatogonia had clear nuclear staining and lined against  
290 the basement membrane; there were abundant Sertoli cells in lumen of tubules (Fig. 2A).

291 Treatment with linuron appeared to reduce spermatogonia, disrupt the normal arrangement of  
292 cell layers in tubule lumens, and cause karyopyknosis (Fig. 2B). There were obvious vacuoles in  
293 nearly all of the cell types. With the increase of linuron dose, these morphological changes  
294 became more severe (Fig. 2C,D) and significant cell loss could be seen in Fig. 2D.

295 The Leydig cells distributing in interstitial space function to secrete male sex hormone.  
296 Under the electron microscope, a distension of rough endoplasmic reticulum in Leydig cells  
297 became evident (Fig. 3B). At the high dose (200 mg/kg), the swollen mitochondria in Leydig  
298 cells could be observed in most cases (Fig. 3C).

299

300

Deleted: typical

Deleted: obvious

303 **Effect of maternal linuron exposure on enzymes and proteins participating in male**  
304 **reproduction**

305 The apparent reproductive toxicity following maternal linuron exposure could be due to  
306 the altered production of male sex hormones or androgen receptor (AR) in fetuses. To test this  
307 hypothesis, we used the immunohistochemistry to examine the expression of a host of selected  
308 enzymes and proteins in fetal Leydig cells from GD20 dams. Data presented in Fig. 4 showed  
309 that PCNA, a marker for DNA synthesis during cell proliferation, was apparently reduced, so  
310 were the enzymes involving in synthesis of testosterone, i.e., P450scc and 3 $\beta$ -HSD. By  
311 quantitation of expression signals, there were 18.3%, 15.5%, and 16.9% reductions in PCNA,  
312 P450scc and 3 $\beta$ -HSD, respectively, as compared to controls ( $p < 0.05$ ) (Table 3), while the signal  
313 levels for AR in Leydig cells were not changed (Fig. 4 and Table 3).

314 To verify the results from immunohistochemical studies, we further employed qPCR to quantify  
315 the mRNAs encoding these proteins. Data presented in Table 4 demonstrated that the gene  
316 expressions of PCNA, P450c17 and 17 $\beta$ -HSD in fetal testes at GD20 were significantly lower,  
317 about 47.0%, 50.8% and 39.9%, respectively, than those in controls ( $p < 0.05$ ), while the gene  
318 expression of AR was not changed (Table 4).

Deleted: immunocytochemistry

Deleted: testosterone

Deleted: immunohistochemical

Deleted: qRCP

Formatted

325 **Discussion**

326 Results of these experiments demonstrate that oral exposure to linuron in mother rats can  
327 profoundly alter the reproductive organ development in male fetal and neonatal rats. The  
328 alteration can be observed at morphological, biochemical, and molecular levels. Under normal  
329 physiological condition, the urogenital folds have two fusions; one is on the surface of the genital  
330 tubercle and the other is positioned in the middle. Upon the formation of complete urethral, the  
331 chamber is absorbed to form the epidermis. Urogenital groove and urogenital fold can integrate  
332 together to form a cavernous body of urethra tube (Lambright et al., 2000). Following maternal  
333 exposure to linuron, however, the fusion of urogenital groove and urogenital fold was incomplete,  
334 resulting in an abnormal location of the urethral orifice. The failure to form a complete  
335 urogenital groove may lead to a shortened anogenital distance in postnatal rats. Our evidence  
336 supports the view that maternal linuron exposure hampers sexual differentiation and  
337 development in male offspring.

338 The formation and differentiation of the gonadal organs during the embryonic  
339 development are regulated by a host of hormones through the hypothalamus-pituitary-gonad axis  
340 in mother as well as in fetus (Barlow et al., 2003; Hotchkiss et al., 2004; Kroupova et al., 2014);  
341 the process is highly sensitive to variation of hormone levels in the fetal stage (Vukusic et al.,  
342 2013). Reports by Fitch et al. (1990) show that from the embryonic day GD17 to the postnatal  
343 day 6-8, the secretion of testosterone in offspring testes reaches the peak, which determines the  
344 early differentiation and development of testis (Sinha et al., 1999; Russell et al., 2008). Other  
345 reports also show that impaired testosterone secretion during this stage usually causes the

Deleted: offsprings

Deleted: offspring of

Deleted: takes place

Deleted: the

Deleted: where the chamber is divided into two rooms.

Deleted: led

Deleted: , and

Deleted: the

Deleted: i

357 irreversible and permanent damage to ~~testicular~~ development, which ~~in turn~~ directly affects the  
358 reproductive function in adulthood (Han et al., 2004; Wu et al., 2010; Esteves et al., 2011). Our  
359 data clearly show that exposure to linuron in mother rats caused a dose-related decline of  
360 testosterone in offspring testes. Thus, it appears that linuron's reproductive ~~toxicity~~ is directly  
361 ~~associated~~ with the production of testosterone.

Deleted: testical

Deleted: toxicity

Deleted: aossicated

362 What is the targeted cell type underlying linuron ~~developmental, reproductive and~~  
363 ~~toxicity~~? Results from electron microscopic studies demonstrated that at GD20, the Leydig cells  
364 in fetal rats appeared to be significantly ~~injured~~ by linuron treatment. The rough endoplasmic  
365 reticulum in Leydig cells became dilated and the mitochondria were swollen. Since the  
366 endoplasmic reticulum in Leydig cells is a known intracellular location ~~where~~ testosterone is  
367 ~~synthesized~~, it is likely that the damage on endoplasmic reticula in Leydig cells, in combination  
368 with the ~~distorted~~ energy supply in ~~malfunctioned~~ mitochondria, may reduce the production of  
369 testosterone from ~~the~~ fetal to postnatal stage.

Deleted: developmental and reproditive toxdicity

Deleted: affected

Deleted: to synthesize

Deleted: hampered

Deleted: malfunctional

Deleted: s

370 Synthesis of testosterone requires numerous enzymes that transport cholesterol across the  
371 mitochondrial ~~membrane~~ and convert cholesterol to pregnenolone; the latter reaction is catalyzed  
372 by mitochondrial P450<sub>scc</sub>. Pregnenolone is then further ~~catalyzed~~ by 3 $\beta$ -HSD to form  
373 progesterone. These reactions are the rate-limiting steps in the synthesis of testosterone. (Arukwe,  
374 2008; Rone et al., 2009; Issop et al., 2013). It is also known that Leydig cells in fetal mouse  
375 differentiate rapidly during GD12 to GD14, followed by ~~synthesis~~ of testosterone. To investigate  
376 the mechanism of linuron toxicity, we determined a number of key enzymes and proteins  
377 involving ~~testosterone~~ production in fetal GD20 rats. Our IHC data demonstrated a significant

Deleted: member

Deleted: catalized

Deleted: the

Deleted: testerstorone

392 reduced expression of P450scc and 3β-HSD in Leydig cells of fetal GD20 rats. The qPCR  
393 experiments confirmed these findings and further indicated a 40-51% reduction of these two  
394 critical enzymes in fetal gonad organs. It is interesting to notice that linuron exposure had no any  
395 significant effect on AR gene expression. Recent data in literature have also suggested that  
396 exposure to other gonadotoxicants such as polychlorinated biphenyls or acetoside can inhibit  
397 P450scc activity and decrease testosterone synthesis, leading to hypospadias and cryptorchidism  
398 (Mcglynn et al., 2009; Liu et al. 2015). Thus, our results establish that linuron exposure in  
399 mothers inhibits the key enzymes indispensable to male sex hormone production. The exact  
400 mechanism on how linuron interacts with these enzymes at molecular and/or genetic levels  
401 remains unknown and deserves further in-depth investigation.

Deleted: futher

Deleted: n

Deleted: ingestigation

402 In summary, the present study confirms the developmental toxicity of linuron on male  
403 reproductive system. Our data show that maternal exposure to linuron results in an altered  
404 development of male gonadal organs, damaged seminiferous tubules, and abnormal Leydig cell  
405 ultrastructure. The mechanism underlying linuron toxicity appears to be associated with the  
406 direct action of the chemical on the production of testosterone in fetal and postnatal offspring.

Deleted: offsprings

407  
408

413

414 **Acknowledgments**

415           This study was partly supported by the Natural Science Foundation of Guizhou  
416 Provincial Scientific and Technology Department Grant (J[2007]2125) (Li Yan), Education  
417 Department of Guizhou Province ([2008]033) (Li Yan), International Scientific and Technology  
418 cooperation project of Guizhou Province (G[2014]7012) (Li Yan), Innovative talent team training  
419 project of Zunyi city ([2015]42) (Li Yan) and the Scientific and Technology Foundation of  
420 Health and Family Planning Commission of Guizhou Provincial (D-424) (Li Yan).

421



Deleted: ¶

## References

- 423 Arukwe A (2008). Steroidogenic acute regulatory (StAR) protein and cholesterol side-chain  
424 cleavage (P450scc)-regulated steroidogenesis as an organ-specific molecular and cellular  
425 target for endocrine disrupting chemicals in fish. *Cell Biol Toxicol* 24(6):527-540.  
426 doi:10.1007/s10565-008-9069-7.
- 427 Auger J, Le Denmat D, Berges R, Doridot L, Salmon B, Canivenc-Lavier MC, and Eustache F  
428 (2013). Environmental levels of oestrogenic and antiandrogenic compounds feminize  
429 digit ratios in male rats and their unexposed male progeny. *Proc Biol Sci* 280(1768):1532.  
430 doi:10.1098/rspb.2013.1532.
- 431 Baskin LS, and Ebbers MB (2006). Hypospadias: anatomy, etiology, and technique. *J Pediatr*  
432 *Surg* 41(3), 463-472. doi:10.1016/j.jpedsurg.2005.11.059.
- 433 Esteves SC, Miyaoka R, and Agarwal A (2011). An update on the clinical assessment of the  
434 infertile male. *Clinics* 66(4):691-700. doi:10.1590/S1807-59322011000400026.
- 435 Fitch RH, Berrebi AS, Cowell PE, Schrott LM, and Denenberg VH (1990). Corpus callosum:  
436 effects of neonatal hormones on sexual dimorphism in the rat. *Brain Res*  
437 515(1-2):111-116. doi:10.1016/0006-8993(90)90584-X.
- 438 Gray LE, Ostby J, Furr J, Wolf CJ, Lambright C, Parks L, and Guillette L (2001). Effects of  
439 environmental antiandrogens on reproductive development in experimental animals. *Hum*  
440 *Reprod Update* 7(3):248-264. doi:10.1093/humupd/7.3.248.
- 441 Han XD, Tu ZG, Gong Y, Shen SN, Wang XY, Kang LN, and Chen JX (2004). The toxic effects  
442 of nonylphenol on the reproductive system of male rats. *Reprod Toxicol* 19(2):215-221.

Deleted: Barlow NJ,  
Phillips SL, Wallace DG,  
Sar M, Gaido KW, and  
Foster PM (2003).  
Quantitative changes in  
gene expression in fetal rat  
testes following exposure  
to di(n-butyl) phthalate.  
*Toxicol Sci* 73(2):431-441.  
doi:10.1093/toxsci/kfg087.

454 doi:10.1016/j.reprotox.2004.06.014.

455 Hotchkiss AK, Parks-Saldutti LG, Ostby JS, Lambright C, Furr J, Vandenberg JG, and Gray LJ  
456 (2004). A mixture of the "antiandrogens" linuron and butyl benzyl phthalate alters sexual  
457 differentiation of the male rat in a cumulative fashion. *Biol Reprod* 71(6):1852-1861.  
458 doi:10.1095/biolreprod.104.031674.

459 Issop L, Rone MB, and Papadopoulos V (2013). Organelle plasticity and interactions in  
460 cholesterol transport and steroid biosynthesis. *Mol Cell Endocrinol* 371(1-2):34-46.  
461 doi:10.1016/j.mce.2012.12.003.

462 Klot CAJV, Kramer MW, Böker A, Herrmann TR, Peters I, Kuczyk MA, and Merseburger AS  
463 (2014). Is there an anti-androgen withdrawal syndrome for enzalutamide? *World J Urol*  
464 32(5):1171-1176. doi:10.1007/s00345-014-1288-3.

465 Kroupova HK, Trubiroha A, Lorenz C, Contardo-Jara V, Lutz I, Grabic R, and Kloas W (2014).  
466 The progestin levonorgestrel affects hypothalamus–pituitary–gonad axis in pubertal roach  
467 (*Rutilus rutilus*). *Toxicol Lett* 229:S114-S115. doi:10.1016/j.toxlet.2014.06.413.

468 Lambright C, Ostby J, Bobseine K, Wilson V, Hotchkiss AK, Mann PC, and Gray LJ (2000).  
469 Cellular and molecular mechanisms of action of linuron: an antiandrogenic herbicide that  
470 produces reproductive malformations in male rats. *Toxicol Sci* 56(2):389-399.  
471 doi:10.1093/toxsci/56.2.389.

472 Liu S, Zhang J, Li W, Zhang T, and Hu D (2015). Acteoside reduces testosterone by inhibiting  
473 cAMP, p450 $\alpha$ , and StAR in rat Leydig cells. *Mol & Cell Toxicol* 11(1):11-17.  
474 doi:10.1007/s13273-015-0002-x.

475 Livak KJ, and Schmittgen TD (2001). Analysis of relative gene expression data using real-time  
476 quantitative PCR and the 2(-Delta Delta C(T)) Method. *Methods* 25(4):402-408.  
477 doi:10.1006/meth.2001.1262.

478 McGlynn KA, Guo X, Graubard BI, Brock JW, Klebanoff MA, and Longnecker MP (2009).  
479 Maternal pregnancy levels of polychlorinated biphenyls and risk of hypospadias and  
480 cryptorchidism in male offspring. *Environ Health Persp* 117(9):1472-1476.  
481 doi:10.1289/ehp.0800389.

482 McIntyre BS, Barlow NJ, Wallace DG, Maness SC, Gaido KW, and Foster PM (2000). Effects of  
483 in utero exposure to linuron on androgen-dependent reproductive development in the  
484 male Crl:CD(SD)BR rat. *Toxicol Appl Pharm* 167(2):87-99. doi:  
485 10.1006/taap.2000.8998.

486 Monosson E, Kelce WR, Lambright C, Ostby J, and Gray LJ (1999). Peripubertal exposure to the  
487 antiandrogenic fungicide, vinclozolin, delays puberty, inhibits the development of  
488 androgen-dependent tissues, and alters androgen receptor function in the male rat.  
489 *Toxicol Ind Health* 15(1-2):65-79. doi:10.1191/074823399678846600.

490 Rone MB, Fan J, and Papadopoulos V (2009). Cholesterol transport in steroid biosynthesis: role  
491 of protein-protein interactions and implications in disease states. *Biochim Biophys Acta*  
492 1791(7):646-658. doi:10.1016/j.bbailip.2009.03.001.

493 Russell LD, Ettlín RA, Hikim APS, and Clegg ED (1993). Histological and Histopathological  
494 Evaluation of the Testis. *Int J Androl* 16(1):83. doi:10.1111/j.1365-2605.1993.tb01156.x.

495 Santos SM, Videira RA, Fernandes MA, Santos MS, Moreno AJ, Vicente JA, and Jurado AS

496 (2014). Toxicity of the herbicide linuron as assessed by bacterial and mitochondrial  
497 model systems. *Toxicol In Vitro* 28(5):932-939. doi:10.1016/j.tiv.2014.04.004.

498 Sharpe RM and Skakkebaek NE (1993). Are oestrogens involved in falling sperm counts and  
499 disorders of the male reproductive tract? *Lancet* 341(8857):1392-1395.  
500 doi:10.1016/0140-6736(93)90953-E.

501 Sinha HA, and Swerdloff RS (1999). Hormonal and genetic control of germ cell apoptosis in the  
502 testis. *Rev Reprod* 4(1):38-47. doi:10.1530/ror.0.0040038.

503 Storgaard L, Bonde JP, and Olsen J (2006). Male reproductive disorders in humans and prenatal  
504 indicators of estrogen exposure: A review of published epidemiological studies. *Repro  
505 Toxicol* 21(1):4-15. doi:10.1016/j.reprotox.2005.05.006.

506 Sultan C, Balaguer P, Terouanne B, Georget V, Paris F, Jeandel C, and Nicolas J (2001).  
507 Environmental xenoestrogens, antiandrogens and disorders of male sexual differentiation.  
508 *Mol Cell Endocrinol* 178(1-2):99-105. doi:10.1016/S0303-7207(01)00430-0.

509 Vukusic PT, Janjic T, Dujmovic I, Poljicanin A, Soljic V, Saraga-Babic M, and Vukojevic K  
510 (2013). The involvement of proliferation and apoptosis in the early human gonad  
511 development. *J Mol Histol* 44(1):55-63. doi:10.1007/s10735-012-9455-6.

512 Wilson VS, Lambright CR, Furr JR, Howdeshell KL, and Earl GLJ (2009). The herbicide linuron  
513 reduces testosterone production from the fetal rat testis during both in utero and in vitro  
514 exposures. *Toxicol Lett* 186(2):73-77. doi:10.1016/j.toxlet.2008.12.017.

515 Wu JJ, Wang KL, Wang SW, Hwang GS, Mao IF, Chen ML, and Wang PS (2010). Differential  
516 effects of nonylphenol on testosterone secretion in rat Leydig cells. *Toxicology*

517 268(1-2):1-7. doi:10.1016/j.tox.2009.10.030.

518

519

520

## 521 **Figure Legends**

522 Fig.1 Pathological changes of the genital tubercle following maternal exposure to linuron.

523 Mother rats received oral gavage at 150 mg/kg from GD13 to GD18; fetal male gonadal  
524 organs at GD20 were dissected for examination. (A). A typical genital tubercle from a  
525 control fetus. Arrowhead indicates a normal urogenital fold. (B). A typical genital  
526 tubercle from a linuron-exposed fetus. Arrowhead indicates no fusion in the urogenital  
527 fold and the epithelial gaps. ( $\times 100$ )

528 Fig. 2 Pathological changes in seminiferous tubules following maternal exposure to linuron.

529 Mother rats received oral gavage at 0 (A), 100 mg/kg (B), 150 mg/kg (C), or 200 mg/kg  
530 (D) from GD13 to GD18. Fetal male dams at GD20 were dissected for examination.  
531 Arrowheads indicate karyopyknosis and vacuoles. ( $\times 400$ ).

532 Fig. 3 Ultrastructure of Leydig cells. Mother rats received oral gavage from GD13 to GD18;

533 fetal male gonadal organ at GD20 were dissected for electron microscopic study. (A) A  
534 typical sample from a control rat. Arrowhead indicates a normal mitochondrion. (B) A  
535 typical sample from a rat treated with 150 mg/kg linuron. Arrowheads indicate a dilated  
536 endoplasmic reticulum. (C) A typical sample from a rat treated with 200 mg/kg linuron.  
537 Arrowhead indicates swollen mitochondrion. ( $\times 12500$ )

538 Fig. 4 Immunohistochemical analysis of PCNA, P450scc, 3 $\beta$ -HSD and AR expression in

539 Leydig cells. Mother rats received oral gavage at 200 mg/kg from GD13 to GD18; fetal  
540 male gonadal organ at GD20 were dissected for IHC study. ( $\times 400$ )

Deleted: goantal

Deleted: mitochondrion

Deleted: mitochondrion

Formatted: Indent: Left: 0", Hanging: 0.5", No widow/orphan control

Deleted: goantal

545

546 **Tables**

Formatted: Font: 14 pt

547

548 Table 1. Forward and reverse primer sequence for selected genes in qPCR study

| Gene    | Forward primer (5'-3') | Reverse primer (5'-3') |       |
|---------|------------------------|------------------------|-------|
| PCNA    | AAGAGGAAGCTGTGTCCATAGA | CTTCATCTTCGATCTTGGGA   | 204bp |
| P450c17 | GGAGAAGCTAATCTGTCAGGAA | GCATCCACGATACCCTCAGT   | 198bp |
| 17β-HSD | CAGAAGAGATTGAGAGGACCA  | CAGGAAATGACTTGGGAGCA   | 158bp |
| AR      | GGACATGCGTTTGGACAGTA   | ACTTCTGTTTCCCTTCCGCA   | 173bp |
| GAPDH   | TGGGTGTGAACCACGAGAA    | GGCATGGACTGTGGTCATGA   | 141bp |

549 The forward and reverse primer sequences for selected genes were designed with the ABI Primer Express  
550 software (Foster City, CA)

551

552

553 Table 2. **Comparison** of testosterone (Tes), anogenital distance (AGD) and body weight

Deleted: Comparison

| Group (mg/kg) | PND2 |             | PND28 |            |                 |
|---------------|------|-------------|-------|------------|-----------------|
|               | n    | Tes (ng/ml) | n     | AGD (mm)   | Body weight (g) |
| 0 (control)   | 10   | 4.63±0.72   | 20    | 20.3±0.65  | 77.5±0.65       |
| 50            | 10   | 4.43±0.62   | 20    | 20.3±0.78  | 77.3±0.56       |
| 100           | 10   | 3.07±1.22*  | 20    | 16.7±1.11* | 77.3±0.44       |
| 150           | 10   | 2.50±0.95*  | 20    | 16.5±0.69* | 77.3±0.52       |
| 200           | 10   | 1.91±0.82*  | 20    | 15.3±0.84* | 76.3±0.42       |

554 For PND2 experiments, male pups (2-3) from 4-5 litters in each treatment group underwent experimentation.

555 Animal numbers were doubled for PND28 study. Data represent mean ± SD. \*:  $p < 0.05$  as compared to  
556 controls. PND: postnatal day.

557

559

560

561 Table 3. Quantitation of signal density of PCNA, P450scc, 3β-HSD and AR expression in GD20  
562 ~~testicular~~ tissue by immunohistochemical analysis

| Group<br>(mg/kg/day) | n | Optical Density |          |          |         |
|----------------------|---|-----------------|----------|----------|---------|
|                      |   | PCNA            | P450scc  | 3β-HSD   | AR      |
| control              | 8 | 1931±39         | 1683±21  | 1714±21  | 1238±68 |
| 200                  | 8 | 1578±18*        | 1422±14* | 1424±28* | 1277±62 |

Deleted: testical

Deleted: Optial

563 Mother rats received oral gavage at 200 mg/kg from GD13 to GD18. Fetal male pups (2 from 4 litters in each  
564 treatment group) at GD20 were dissected for IHC examination. The optical density for each protein was  
565 analyzed using IPWIN60 software. Data represent mean ± SD, n=8 different fetal rats. \*: p<0.05 compared to  
566 controls.

Deleted: dams

567

568

569 Table 4. Relative mRNA expression of PCNA, 17β-HSD, P450c17 and AR in GD20 testes

| group    | n  | 2 <sup>-ΔΔCt</sup> |            |            |           |
|----------|----|--------------------|------------|------------|-----------|
|          |    | PCNA               | 17β-HSD    | P450c17    | AR        |
| control  | 10 | 1.64±0.98          | 1.87±0.26  | 1.53±0.50  | 1.51±0.43 |
| exposure | 10 | 0.87±0.32*         | 0.92±0.26* | 0.92±0.42* | 1.35±0.56 |

570 Mother rats received oral gavage at 200 mg/kg from GD13 to GD18. Fetal gonadal organs (2 from 5 litters in  
571 each treatment group) at GD20 were dissected for qPCR analysis. Data represent mean ± S.D. \*: p<0.05  
572 compared to controls.

573
